# Supplementary material for: Molecular Characterization of Chikungunya Virus, Philippines, 2011–2013
Source: PubMed Central journal article supplement (PMC4861512; doi:10.3201/eid2205.151268), 2016-05
Supplement: 15-1268-Techapp-s1.pdf [file 15-1268-Techapp-s1.pdf]

# Molecular Characterization of Chikungunya Virus, Philippines, 2011–2013

## Technical Appendix

**Technical Appendix Table 1.** Chikungunya viruses newly sequenced in this study, Philippines, 2011–2013, n = 31

| Strain name            | GenBank<br>accession no. | Genotype | Amino acid at<br>position 226 | Year<br>collected | Month<br>collected | Country     | Region | Province      |
|------------------------|--------------------------|----------|-------------------------------|-------------------|--------------------|-------------|--------|---------------|
| CKV_PHL_2013_CK13–0613 | LC064714                 | Asian    | Alanine                       | 2013              | July               | Philippines | CAR    | Ifugao        |
| CKV_PHL_2013_CK13–2256 | LC064715                 | Asian    | Alanine                       | 2013              | Apr                | Philippines | CAR    | Apayao        |
| CKV_PHL_2012_CK12–0151 | LC064716                 | Asian    | Alanine                       | 2012              | Nov                | Philippines | NCR    | NCR           |
| CKV_PHL_2013_CK13–1138 | LC064717                 | Asian    | Alanine                       | 2013              | Nov                | Philippines | 1      | LaUnion       |
| CKV_PHL_2013_CK13–2289 | LC064718                 | Asian    | Alanine                       | 2013              | Aug                | Philippines | 1      | Ilocos Sur    |
| CKV_PHL_2012_CK12–0559 | LC064728                 | Asian    | Alanine                       | 2012              | Oct                | Philippines | 2      | Isabela       |
| CKV_PHL_2013_CK13–1670 | LC064729                 | Asian    | Alanine                       | 2013              | July               | Philippines | 2      | Quirino       |
| CKV_PHL_2013_CK13–3514 | LC064730                 | Asian    | Alanine                       | 2013              | Aug                | Philippines | 2      | CagayanValley |
| CKV_PHL_2012_CK12–0148 | LC064731                 | Asian    | Alanine                       | 2012              | Aug                | Philippines | 4A     | Laguna        |
| CKV_PHL_2012_CK12–0251 | LC064732                 | Asian    | Alanine                       | 2012              | Aug                | Philippines | 4A     | Laguna        |
| CKV_PHL_2012_CK12–0545 | LC064733                 | Asian    | Alanine                       | 2012              | Oct                | Philippines | 4B     | Romblon       |
| CKV_PHL_2012_CK12–0546 | LC064734                 | Asian    | Alanine                       | 2012              | Dec                | Philippines | 4B     | Romblon       |
| CKV_PHL_2012_CK12–0702 | LC064735                 | Asian    | Alanine                       | 2012              | Nov                | Philippines | 4B     | Marinduque    |
| CKV_PHL_2012_CK12–0708 | LC064736                 | Asian    | Alanine                       | 2012              | Nov                | Philippines | 4B     | Marinduque    |

| Strain name            | GenBank<br>accession no. | Genotype | Amino acid at<br>position 226 | Year<br>collected | Month<br>collected | Country     | Region | Province               |
|------------------------|--------------------------|----------|-------------------------------|-------------------|--------------------|-------------|--------|------------------------|
| CKV_PHL_2012_M12-1853  | LC064737                 | Asian    | Alanine                       | 2012              | July               | Philippines | 4B     | Palawan                |
| CKV_PHL_2012_CK12-0674 | LC064738                 | Asian    | Alanine                       | 2012              | Oct                | Philippines | 5      | Albay                  |
| CKV_PHL_2012_CK12-0675 | LC064739                 | Asian    | Alanine                       | 2012              | Jun                | Philippines | 5      | Albay                  |
| CKV_PHL_2013_CK13-0569 | LC064740                 | Asian    | Alanine                       | 2013              | July               | Philippines | 6      | Negros Occidental      |
| CKV_PHL_2013_CK13-4012 | LC064741                 | Asian    | Alanine                       | 2013              | Nov                | Philippines | 6      | Aklan                  |
| CKV_PHL_2012_CK12-0884 | LC064742                 | Asian    | Alanine                       | 2012              | Dec                | Philippines | 8      | Samar                  |
| CKV_PHL_2012_CK12-0906 | LC064743                 | Asian    | Alanine                       | 2012              | Feb                | Philippines | 8      | Samar                  |
| CKV_PHL_2013_CK13-0224 | LC064744                 | Asian    | Alanine                       | 2013              | July               | Philippines | 9      | Zamboanga Del<br>Norte |
| CKV_PHL_2011_CK11-0112 | LC064719                 | Asian    | Alanine                       | 2011              | Oct                | Philippines | 11     | Davao Del Sur          |
| CKV_PHL_2011_CK11-0123 | LC064720                 | Asian    | Alanine                       | 2011              | Oct                | Philippines | 11     | Davao Del Sur          |
| CKV_PHL_2011_CK11-0137 | LC064721                 | Asian    | Alanine                       | 2011              | Sept               | Philippines | 11     | Davao Del Sur          |
| CKV_PHL_2012_CK12-0275 | LC064722                 | Asian    | Alanine                       | 2012              | Oct                | Philippines | 11     | CompostellaValley      |
| CKV_PHL_2012_CK12-0536 | LC064724                 | Asian    | Alanine                       | 2012              | Nov                | Philippines | 11     | CompostellaValley      |
| CKV_PHL_2012_CK12-0686 | LC064725                 | Asian    | Alanine                       | 2012              | Oct                | Philippines | 11     | CompostellaValley      |
| CKV_PHL_2012_CK12-0455 | LC064723                 | ECSA     | Valine                        | 2012              | Jan                | Philippines | 11     | Davao Del Sur          |
| CKV_PHL_2013_CK13-0088 | LC064726                 | ECSA     | Valine                        | 2013              | Jan                | Philippines | 11     | Davao Oriental         |
| CKV_PHL_2013_CK13-0096 | LC064727                 | ECSA     | Valine                        | 2013              | May                | Philippines | 11     | Davao Oriental         |

\*CAR, Cordillera Administrative Region; ECSA, East/Central/South African; NCR, National Capital Region.

**Technical Appendix Table 2.** Reference strains obtained from GenBank used in this study,\* n = 77

| Country                  | Year collected | GenBank accession no. | Genotype |
|--------------------------|----------------|-----------------------|----------|
| Angola                   | 1962           | HM045823              | ECSA     |
| Bhutan                   | 2012           | KC731582              | ECSA     |
| Cambodia                 | 2011           | JQ861258              | ECSA     |
| Central African Republic | 1978           | HM045822              | ECSA     |
| China                    | 2008           | GU199353              | ECSA     |
| China                    | 2010           | JQ065889              | ECSA     |
| China                    | 2010           | JQ065892              | ECSA     |
| China                    | 2012           | KC488650              | Asian    |
| Congo                    | 1960           | HM045809              | ECSA     |
| East Timor               | 2010           | GU969242              | Asian    |
| France                   | 2009           | FR846307              | Asian    |
| French Polynesia         | 2014           | KM98561               | Asian    |
| India                    | 1963           | EF027140              | Asian    |
| India                    | 1976           | KC969207              | Asian    |
| India                    | 2006           | GQ428210              | ECSA     |
| India                    | 2007           | EU170527              | ECSA     |
| India                    | 2007           | FJ000069              | ECSA     |
| India                    | 2010           | HM159389              | ECSA     |
| India                    | 2011           | KF425514              | ECSA     |
| India                    | 2011           | KJ679578              | ECSA     |
| Indonesia                | 1983           | HM045791              | Asian    |
| Indonesia                | 1985           | HM045797              | Asian    |
| Indonesia                | 2001           | KC879561              | Asian    |
| Indonesia                | 2002           | KC879568              | Asian    |
| Indonesia                | 2003           | KC879572              | Asian    |
| Indonesia                | 2004           | KC879564              | Asian    |
| Indonesia                | 2007           | FJ807887              | Asian    |
| Indonesia                | 2008           | FJ807888              | Asian    |
| Indonesia                | 2008           | KC879577              | Asian    |
| Indonesia                | 2010           | AB678677              | Asian    |
| Indonesia                | 2010           | AB678691              | Asian    |
| Indonesia                | 2010           | KC862329              | ECSA     |
| Indonesia                | 2011           | AB678687              | Asian    |
| Indonesia                | 2013           | KF872195              | Asian    |
| Indonesia                | 2013           | KM673291              | Asian    |
| Italy                    | 2007           | EU244823              | ECSA     |

| Country       | Year collected | GenBank accession no. | Genotype |
|---------------|----------------|-----------------------|----------|
| IvoryCoast    | 1981           | HM045818              | WA       |
| Kenya         | 2004           | HQ456254              | ECSA     |
| Reunion       | 2005           | FR717336              | ECSA     |
| Malaysia      | 2006           | EU703762              | Asian    |
| Malaysia      | 2006           | FN295483              | Asian    |
| Malaysia      | 2008           | FJ998173              | ECSA     |
| Malaysia      | 2008           | FN295485              | ECSA     |
| Malaysia      | 2009           | FJ807895              | ECSA     |
| Mauritius     | 2006           | EU564334              | ECSA     |
| Mexico        | 2014           | KP851709              | Asian    |
| Myanmar       | 2009           | KF151177              | ECSA     |
| New Caledonia | 2011           | HE578162              | Asian    |
| Philippines   | 1985           | HM045790              | Asian    |
| Philippines   | 1985           | HM045800              | Asian    |
| Philippines   | 2012           | CWHY01000001          | Asian    |
| Philippines   | 2012           | CXNU01000001          | Asian    |
| Philippines   | 2012           | CWHX01000001          | Asian    |
| Philippines   | 2012           | CWIM01000001          | Asian    |
| Philippines   | 2012           | CXNV01000001          | Asian    |
| Philippines   | 2012           | CWHZ01000001          | Asian    |
| Philippines   | 2012           | CXNT01000001          | Asian    |
| Philippines   | 2013           | AB860301              | Asian    |
| Senegal       | 1963           | HM045821              | ECSA     |
| Senegal       | 1966           | HM045816              | WA       |
| Senegal       | 2009           | JQ943708              | WA       |
| Singapore     | 2006           | FJ807896              | ECSA     |
| Singapore     | 2008           | FJ445483              | Asian    |
| Singapore     | 2008           | FJ445511              | ECSA     |
| Singapore     | 2009           | HM067743              | ECSA     |
| South Africa  | 1976           | HM045795              | ECSA     |
| Sri Lanka     | 2006           | AB455493              | ECSA     |
| Tanzania      | 1953           | HM045811              | ECSA     |
| Thailand      | 1966           | AF192900              | Asian    |
| Thailand      | 1975           | HM045814              | Asian    |
| Thailand      | 1978           | HM045808              | Asian    |
| Thailand      | 1988           | HM045789              | ECSA     |
| Thailand      | 1995           | HM045796              | ECSA     |

| Country  | Year collected | GenBank accession no. | Genotype |
|----------|----------------|-----------------------|----------|
| Thailand | 2009           | JN661149              | ECSA     |
| Tonga    | 2014           | KM985981              | Asian    |
| Uganda   | 1982           | HM045812              | ECSA     |
| Yemen    | 2011           | KC614648              | ECSA     |

\*ECSA, East/Central/South African; WA, West African.

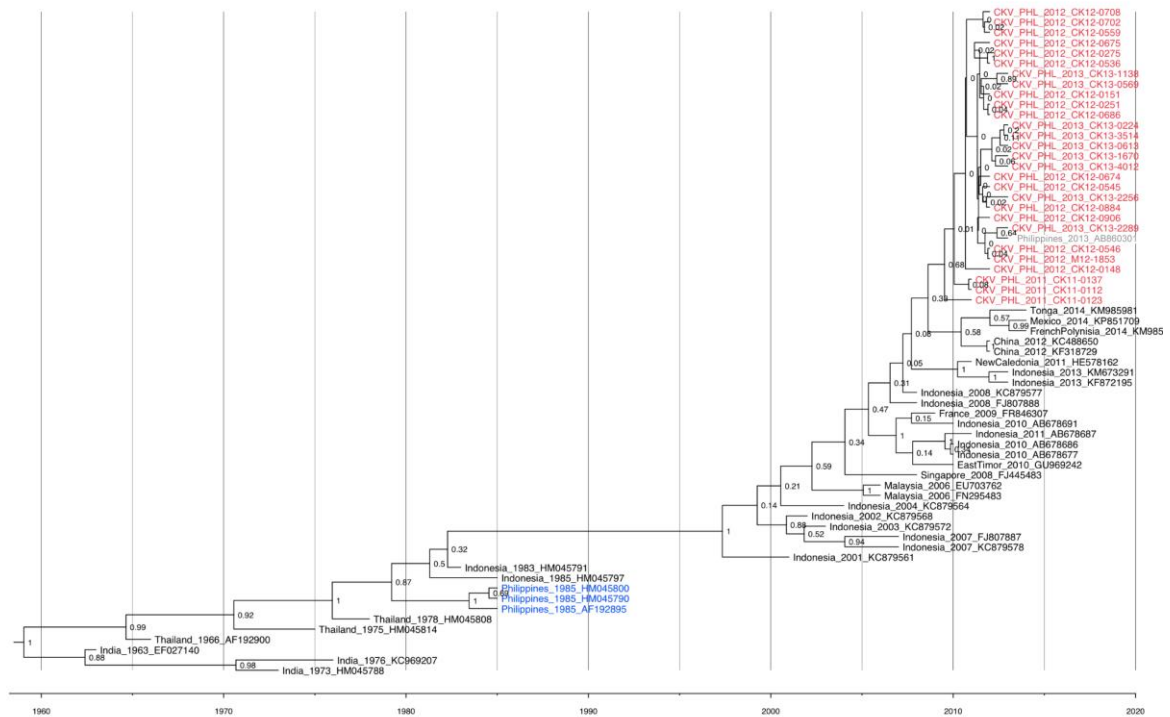

**Technical Appendix Figure 1.** Maximum clade credibility (MCC) tree of Asian genotype of chikungunya virus. MCC tree of Asian genotype was inferred by molecular clock analysis. Branch lengths are temporally scaled, and the x-axis shows the time unit (year). Red indicates Philippine viruses analyzed in this study; blue indicates Philippine strains in the 1980s obtained from GenBank. The posterior probability values are indicated at nodes.

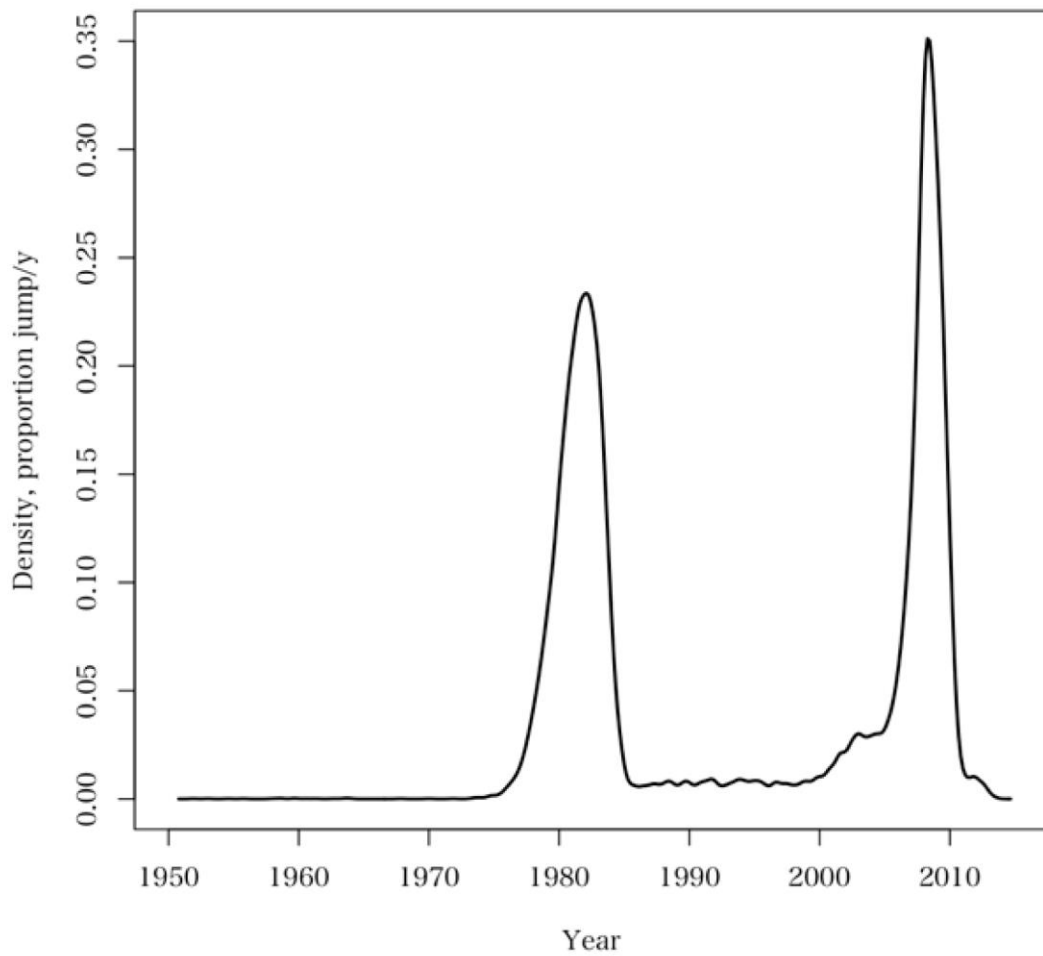

**Technical Appendix Figure 2.** Markov jump density of viral migrations of chikungunya virus over time between Philippines and Indonesia. The Markov jump along the branches of the posterior trees of Asian genotype were estimated, and the history of the migrations between the Philippines and Indonesia was inferred by summarizing the Markov jump density using kernel density estimation.
